# Supplementary material
Source: PubMed Central journal article supplement (PMC5885209)
Supplement: jamaneurol-75-428-s001.pdf [file jamaneurol-75-428-s001.pdf]

## Supplementary Online Content

Stork L, Ellenberger D, Beißbarth T, et al. Differences in the responses to apheresis therapy of patients with 3 histopathologically classified immunopathological patterns of multiple sclerosis. *JAMA Neurol*. Published online February 5, 2018. doi: 10.1001/jamaneurol.2017.4842

### **eTable.** Antibody list

This supplementary material has been provided by the authors to give readers additional information about their work.

**eTable:** Antibody list

| Protein Target                                      | Antibody type          | Catalog #/clone  | Source                             | Antibody specificity                                              |
|-----------------------------------------------------|------------------------|------------------|------------------------------------|-------------------------------------------------------------------|
| Proteolipid protein (PLP)                           | Mouse monoclonal (mc)  | MCA839G/plpc1    | Bioyol/<br>Serotec                 | Specific band of 25kDa m.w. in human brain lysate                 |
| Myelin basic protein (MBP)                          | Rabbit polyclonal (pc) | A0623            | Dako                               | Specific band of 14, 17, 18, and 21 kDam.w. in mouse brain lysate |
| Myelin oligodendrocyte glycoprotein (MOG)           | Rabbit mc              | Ab109746/EP428 1 | Abcam                              | Specific band of 53 kDa m.w. in Jurkat cell lysate                |
| 2'3'-cyclic nucleotide 3'phosphodiesterase (CNPase) | Mouse mc               | SMI19R/CNP       | Stenberger Monoclonals/<br>Covance | Specific band of 48 kDa m.w. in rat whole brain lysate            |
| Myelin associated glycoprotein (MAG)                | Mouse mc               | Ab89780          | Abcam                              | Specific band of 28kDa m.w. in human brain lysate                 |
| Complement C9neo (C9neo)                            | Mouse mc               | Clone B7         | Prof. Morgan Cardiff, UK           | Specific high m.w. band and 65 kDa in activated serum             |
| Terminal complement complex (TCC) and C9            | Rabbit anti-human; pc  | -                | Prof. Morgan Cardiff, UK           | Specific high m.w. band and 65 kDa in activated serum             |
| Terminal complement complex (TCC) and C9            | Rabbit anti-rat; pc    | -                | Prof. Morgan Cardiff, UK           | Specific high m.w. band and 65 kDa in activated serum             |
| Aquaporin-4 (AQP-4)                                 | Rabbit pc              | A5971            | Sigma-Aldrich                      | Specific band of 32 kDa m.w. in rat brain membrane lysate         |

Formalin-fixed, paraffin-embedded 4 µm thick slides were stained with hematoxylin and eosin, luxol-fast blue/periodic acid-Schiff and Bielschowsky's silver impregnation.

Immunohistochemical study were performed with an avidin-biotin based method using antibodies against myelin proteins (anti-proteolipid protein (PLP), anti-myelin basic protein (MBP), anti-myelin oligodendrocyte glycoprotein (MOG), anti-2'3'-cyclic nucleotide 3'phosphodiesterase (CNPase), anti-myelin-associated glycoprotein (MAG)), against the terminal complement complex (TCC) and complement C9neo antigen (C9neo), and against aquaporin-4 (AQP4).
